1 **Screen-based media device use, its associated factors and sleep**  
2 **outcomes among undergraduate health students studying in**  
3 **colleges of Kathmandu valley, Nepal**

4 Karina Maharjan<sup>1</sup>, Rajan Paudel<sup>1</sup>, Kshitij Kunwar<sup>1\*</sup>

5

6

7

8 <sup>1</sup>Central Department of Public Health, Institute of Medicine, Tribhuvan University,  
9 Kathmandu, Nepal

10

11

12 \*Corresponding author:

13 E-mail: [kshitijkunwar7@gmail.com](mailto:kshitijkunwar7@gmail.com) (KK)

## 14 **Abstract**

15 People of all age groups are engaged with various screen-based devices. Use of screen-based  
16 media devices beyond duration considered problematic has become a problem worldwide.  
17 Yet, undergraduate students are engaged in various screen-based activities for academic  
18 works and entertainment which can influence their sleep.

19 A descriptive cross-sectional study design was used to collect information from 384  
20 undergraduate students using a web-based questionnaire and convenience sampling technique.  
21 The data collected was analyzed using IBM SPSS Statistics 20.0. Descriptive and regression  
22 analyses were done to explore factors that influence screen-based media use.

23 The average duration of screen-based media use by the participants was found to be 7.12  
24 hours per day. Factors such as sex of the participants, the use of screen-based media during  
25 major mealtimes and home-specific rules limiting screen-based media use were found to be  
26 associated with screen-based media use. Only 45.3% of participants got the recommended  
27 hours of sleep (7 or more hours). Around 9.4% of the participants had long sleep onset  
28 latency (more than 45 minutes). Participants who used screen-based media devices during  
29 night before sleep were more likely to get insufficient sleep (OR (Odds Ratio) 3.668, 95% CI  
30 (Confidence Interval) (1.784-7.539)).

31 A significant association was found between sex of the participants, use of screen-based  
32 media devices during major meal times and home rules limiting screen-based media use with  
33 the use of screen-based media for five hours or more per day. Screen-based media use and  
34 screen-based media use during night influence the quantity of sleep. Overuse of screen-based  
35 media is degrading the quality of sleep among undergraduate health students and is an  
36 alarming problem. There is a need to promote good sleeping habits through the reduction of

37 this modifiable behaviour, which could be done by promoting home-based rules about  
38 screen-based media devices use, especially at night before sleep.

39 **Keywords:** Screen time, screen-based media use, screen-based media use and sleep, sleep  
40 quality, sleep quantity

## 41 **Introduction**

42 In the last decade there has been a sharp increase in availability and use of screen-based  
43 media devices such as television, laptop, smartphones, videogame consoles and computers  
44 and as a result people are exposed to unintentional artificial light [1]. Having access to these  
45 technologies has become an important part of everyday life. Most of the adults have at least  
46 one electronic media device in their bedroom. These electronic devices play an important part  
47 to support education of students and have also become a medium of entertainment. Nowadays  
48 people spend most of their leisure time using screen-based media devices. Not only during  
49 leisure time but they also tend to use it alongside performing any other work. College  
50 students are found engaged with various screen-based devices. They are engaged in various  
51 screen-based media related activities for the purpose of entertainment or works related to  
52 academics. Also, those devices are used to attend classes remotely, complete various  
53 assignments and assignments and reading materials are also distributed in forms that can be  
54 accessed through screen-based devices. Academic works are also increasing screen time of  
55 college students. It is seen that nine out of every ten college students use laptop or phone on a  
56 regular basis [2].

57 Use of screen-based media devices above recommended duration has become a problem  
58 worldwide. People of all age groups including children, adolescents, adults or elderly are  
59 engaged in various screen-based activities. While waking a teenager in the morning, there is  
60 higher odds that we will find a cell phone under their pillow. It was probably the last thing  
61 that they used before sleeping and probably the first thing that they will touch after waking up  
62 [3]. Screen-based media use is affected by various factors that may be individual factors i.e.  
63 gender, physical activity, home physical factors i.e. availability, location and accessibility of  
64 devices and social factors i.e. rules and limitation, TV co-viewing [4]. Screen time usage

65 among students is due to academic requirement and need for being connected socially  
66 through electronic devices [2].

67 A study on technology use among college students found that students are found spending an  
68 average of 12 hours daily in some types of media among which nine and a half hours are  
69 spent with their gadgets like mobile devices, gaming devices, computers, etc [5]. Mostly  
70 people are awake 16 to 18 hours a day, among which spending 12 hours in electronic devices  
71 is a lot.

72 Sleep is an important part of human life. It is estimated that humans spend a third of their  
73 lifetime sleeping or attempting to do so [6]. Sufficient sleep duration is required for healthy  
74 growth and development of the mind and body especially for children and adolescents.  
75 College students should get about seven to nine hours of sleep [7]. Getting required amount  
76 of sleep helps improve grades, lowers the risk of obesity, improves memory, improves mood.

77 Active use of screen-based media among college going students especially night time use  
78 affects sleep in a negative way, it can be a factor for short sleep duration, disturbed sleep,  
79 increased sleep onset latency and delayed bed, wake up time. It causes sleep deprivation  
80 among them. College student may become sleep deprived due to various factors such as  
81 lighting, sleep environment, medications, body pain, aches, stress, shift based work [8].

82 Among these factors screen time and excessive use of light emitting device are common  
83 factors [9]. Surveys have shown the association of screen-based media use with sleep [6,9–  
84 12]. Sleep quality is found negatively correlated with hours spent on electronic devices [13].

85 Use of media before sleep is an ascribed factor for insufficient sleep among younger people  
86 and adult [14]. Studies have shown adverse association between screen-based media use and  
87 sleep health where delayed bedtime and shorter total sleep have been found to be most  
88 consistently related to media use [15–17].

89 Poor sleep can negatively affect academic performance. Inadequate sleep is also associated  
90 with cardiovascular, inflammatory and metabolic consequences. Insufficient sleep to an  
91 individual is shown to be associated with impaired cellular responses, depression, anxiety and  
92 obesity [6]. Therefore, this study aimed and has determined screen-based media device use,  
93 its associated factors and sleep outcomes among undergraduate health students from  
94 Kathmandu valley, Nepal.

## 95 **Methods**

### 96 **Study design and setting including study site, design, sample size** 97 **and sampling**

98 The descriptive cross-sectional design was designed to assess the screen-based media device  
99 use, its associated factors and sleep outcomes among the undergraduate students of health  
100 background studying in colleges within Kathmandu valley (Kathmandu, Bhaktapur and  
101 Lalitpur districts). The respondents included Bachelor of Medicine and Bachelor of Surgery  
102 (MBBS), Bachelor of Dental Surgery (BDS), Bachelor in Public Health (BPH), Bachelor of  
103 Science in Medical Laboratory Technology (BSc. MLT), Bachelor in Pharmacy (B. Pharm),  
104 Bachelor of Science in Nursing (Bsc. Nursing), Bachelor of Nursing Science (BNS) and  
105 Bachelor in Optometry (B. optom), BPT (Bachelor in Physiotherapy), BASLP (Bachelor of  
106 Audiology & Speech Language Pathology) students. Data was collected from the  
107 undergraduates remotely by administering web-based questionnaire considering the risk of  
108 infection from COVID-19 by mobilizing the students' network online.

109 The sample size was calculated using formula,  $n = Z^2 p(1-p) / e^2$  and sample size was  
110 calculated to be 347, assuming 10% non-response rate it was fixed as 382.

## 111 **Data collection**

112 The questionnaire was adopted from previous studies Questionnaire regarding sleep was  
113 adapted based on Holly Scott [12] and questionnaire regarding screen-based media use and  
114 factors associated were adapted from Granich et.al [4]. The questionnaire had four sections:  
115 socio-demographic information, home media environment, screen time and sleep outcomes.  
116 The main outcome variable were screen time and factors affecting screen-based media use.  
117 Screen time referred to the total hours spent using screen-based media devices. Pretesting was  
118 carried out among 40 undergraduate students. The data was collected from 15-JAN-2021 to  
119 28-FEB-2021.

120 Ethical approval for the study was obtained from the Institutional Review Board (IRB),  
121 Maharajgunj Medical Campus, Institute of Medicine, Tribhuvan University, Kathmandu,  
122 Nepal (Approval letter reference number: 201(6-11) E2 077/078). Participants were informed  
123 about the process, objective of the study, their privacy and confidentiality of the information  
124 they provide. Participants provided informed consent in the same web-based form before they  
125 could take part in the study by answering a question related to agreeing or disagreeing to take  
126 part in the study which they could voluntarily choose as “Yes” or “No”.

## 127 **Data processing and analysis**

128 Data collected online was downloaded and Microsoft Excel was used to clean the data and  
129 was exported to IBM SPSS Statistics 20.0 for further coding and analysis. Information of  
130 independent variables were analysed using descriptive statistics namely frequency,  
131 percentage, median.

132 Inferential statistics using Chi-square test was done to find out the association between  
133 screen-based media use and independent variables and logistic regression was performed to

134 determine the strength of association. Confidence interval of 95% was used and p-value  
135 <0.05 was considered statistically significant.

## 136 **Results**

137 Table 1 shows the demographic characteristics 384 participants of the study which included  
138 41.1% male and 58.9% female participants. The median age of the participants was 22 years.

139 **Table 1: Demographic characteristics of participants (N=384)**

| <b>Characteristics</b>                                        | <b>Number</b> | <b>Percentage</b> |
|---------------------------------------------------------------|---------------|-------------------|
| <b>Age Group (in years)</b>                                   |               |                   |
| < 20                                                          | 51            | 13.3              |
| 20 or above                                                   | 133           | 86.7              |
| <b>Median age</b>                                             | 22            |                   |
| <b>Interquartile Range</b>                                    | 20-23         |                   |
| <b>Sex</b>                                                    |               |                   |
| Male                                                          | 158           | 41.1              |
| Female                                                        | 226           | 58.9              |
| <b>Faculty</b>                                                |               |                   |
| BPH                                                           | 119           | 31.0              |
| B. Pharm                                                      | 57            | 14.8              |
| MBBS                                                          | 37            | 9.6               |
| BDS                                                           | 48            | 12.5              |
| BNS or Bsc. Nursing                                           | 72            | 18.8              |
| Others (Bsc MLT, B.Optom, BPT,<br>BASLP etc.)                 | 51            | 13.3              |
| <b>Study Year</b>                                             |               |                   |
| First year (1 <sup>st</sup> and 2 <sup>nd</sup> semester)     | 100           | 26.0              |
| Second year (3 <sup>rd</sup> and 4 <sup>th</sup> semester)    | 71            | 18.5              |
| Third year (5 <sup>th</sup> and 6 <sup>th</sup> semester)     | 85            | 22.1              |
| Fourth year and above (7 <sup>th</sup> semester and<br>above) | 128           | 33.3              |



### **University**

|                                  |     |      |
|----------------------------------|-----|------|
| Tribhuvan University             | 262 | 68.2 |
| Kathmandu University             | 46  | 12.0 |
| Pokhara University               | 27  | 7.0  |
| Purbanchal University            | 37  | 9.6  |
| Patan Academy of Health Sciences | 12  | 3.1  |

### **Father's Education**

|                             |     |      |
|-----------------------------|-----|------|
| Upto secondary level        | 114 | 29.7 |
| Higher than Secondary level | 270 | 70.3 |

### **Mother's Education**

|                                   |     |      |
|-----------------------------------|-----|------|
| Illiterate (can't read and write) | 40  | 10.4 |
| Upto secondary level              | 167 | 43.5 |
| Higher than Secondary level       | 177 | 46.1 |

### **Monthly Income of Family (in Nepali**

#### **Rupees)**

|                  |     |      |
|------------------|-----|------|
| Less than 25,000 | 111 | 28.9 |
| 25,000 - 50,000  | 141 | 36.7 |
| More than 50,000 | 132 | 34.4 |

140

141 The household media environment plays role in screen-based media behaviour. It was found  
142 that all participants come with a household of more than three media device of some kind and  
143 79.4% participants had their own screen-based media devices as shown in Table 2. It was  
144 found that 21.6% of the participant's household had some rules limiting the screen-based  
145 media use such as allocated screen time and in 39.6% participant's homes, screen-based  
146 media devices were being viewed during major meals. Participant's household with 3 or more  
147 variety of screen-based media device among the five types taken under this study was found  
148 to be 92.4%.

149 **Table 2: Household media environment and screen-based media use (N=384)**

| <b>Household media environment and screen-based media use</b>                 | <b>Number</b> | <b>Percentage</b> |
|-------------------------------------------------------------------------------|---------------|-------------------|
| Have internet connection                                                      | 349           | 90.9              |
| Have access to TV channels                                                    | 320           | 83.3              |
| Have own screen-based media device                                            | 305           | 79.4              |
| Presence of home Rules/Regulations about media use                            | 83            | 21.6              |
| Use screen-based media during major meals (breakfast, lunch, dinner)          | 152           | 39.6              |
| <b>Number of types of screen-based media devices present in the household</b> |               |                   |
| Less than 3 types                                                             | 29            | 7.6               |
| Equal to or more than 3 types                                                 | 355           | 92.4              |
| <b>Number of types of screen-based media device owned by the respondent</b>   |               |                   |
| None                                                                          | 79            | 20.6              |
| One type                                                                      | 90            | 23.4              |
| Two or more types                                                             | 215           | 56                |
| <b>Average screen-based media use in 24 hours</b>                             |               |                   |
| ≥5 hours                                                                      | 294           | 76.6              |
| <5 hours                                                                      | 90            | 23.4              |
| <b>Average duration of screen-based media use per 24 hours</b>                | 7.12 hours    |                   |
| <b>Screen-based media use before bedtime</b>                                  |               |                   |
| Doesn't use screen-based media                                                | 43            | 11.2              |

|                         |     |      |
|-------------------------|-----|------|
| Uses screen-based media | 341 | 88.8 |
|-------------------------|-----|------|

**Duration of screen-based media use before**

**bedtime**

|          |     |      |
|----------|-----|------|
| ≤ 1 hour | 178 | 46.3 |
| 1-2 hour | 117 | 30.5 |
| >2 hour  | 46  | 12.0 |

---

150

151 The major study variable of this research was screen-based media use among undergraduate  
 152 students of the study area. Participants were asked total hours of use of screen-based media  
 153 devices in 24 hours. The responses were then classified as <5 hours and ≥ 5 hours of use, on  
 154 the basis of association seen with screen-based media use for more than or equals to five  
 155 hours with computer vision syndrome.

156 Table 2 shows that 76.6 % participants spend more than or equals to 5 hours of their time  
 157 being engaged in some kind of screen-based media activity in 24 hours. The average hours of  
 158 screen-based media device use among the study participants was 7.12 hours per day (24  
 159 hours). Majority (69.5%) participants responded that they prefer to use smartphones over  
 160 other screen-based medias. As for the purpose of use, majority (46.1%) of the participants  
 161 reported using screen-based media devices for entertaining themselves.

162 Table 3 shows the sleep related outcomes of the participants with average sleep of 6.72 hours.  
 163 Sleep onset latency refers to the time required for an individual to fall asleep, it was found  
 164 that 9.4% participants have long SOL (Sleep Onset Latency) (more than 45 minutes).

165

166 **Table 3: Sleep outcomes of participants (N=384)**

| <b>Sleep Outcomes</b> | <b>Number</b> | <b>Percentage</b> |
|-----------------------|---------------|-------------------|
| <b>Sleep time</b>     |               |                   |
| Before 11 PM          | 214           | 55.7              |

|                                  |            |      |
|----------------------------------|------------|------|
| 11 PM and after                  | 170        | 44.3 |
| <b>Sleep Onset Latency (SOL)</b> |            |      |
| ≤ 45 minutes                     | 348        | 90.6 |
| > 45 minutes                     | 36         | 9.4  |
| <b>Total sleep duration</b>      |            |      |
| <7 hours                         | 210        | 54.7 |
| ≥ 7 hours                        | 174        | 45.3 |
| Average hours of sleep           | 6.72 hours |      |
| Range of total hours of sleep    | 2-11 hours |      |

167

168 Results from the study showed that screen-based media use was associated with sex of the  
 169 participants, mealtime viewing of the screen-based media and rules limiting screen-based  
 170 media use as shown in Table 4.

171

172 **Table 4: Association between variables and screen-based media use**

| Characteristics                    | Screen-based media use |               | p-value          |
|------------------------------------|------------------------|---------------|------------------|
|                                    | ≥ 5 hours (%)          | < 5 hours (%) |                  |
| <b>Age in years</b>                |                        |               |                  |
| <20                                | 38 (74.5)              | 13 (25.5)     | 0.710            |
| 20 and above                       | 256 (76.9)             | 77 (23.1)     |                  |
| <b>Sex</b>                         |                        |               |                  |
| Male                               | 138 (87.3)             | 20 (12.7)     | <b>&lt;0.001</b> |
| Female                             | 156 (69)               | 70 (31)       |                  |
| <b>Own personal device</b>         |                        |               |                  |
| Yes                                | 237 (77.7)             | 68 (22.3)     | 0.300            |
| No                                 | 57 (72.2)              | 22 (27.8)     |                  |
| <b>Has internet Access</b>         |                        |               |                  |
| Yes                                | 264 (75.6)             | 85 (24.4)     | 0.187            |
| No                                 | 30 (85.7)              | 5 (14.3)      |                  |
| <b>Availability of TV channels</b> |                        |               |                  |
| Available                          | 240 (75)               | 80 (25)       | 0.110            |

|                                                                            |            |           |              |
|----------------------------------------------------------------------------|------------|-----------|--------------|
| Not available                                                              | 54 (84.4)  | 10 (15.6) |              |
| <b>Uses screen-based media device during major meal time</b>               |            |           |              |
| Yes                                                                        | 126 (82.9) | 26 (17.1) | <b>0.019</b> |
| No                                                                         | 168 (72.4) | 64 (27.6) |              |
| <b>Presence of Rule about using screen-based media device at household</b> |            |           |              |
| Yes                                                                        | 56 (67.5)  | 27 (17.1) | <b>0.029</b> |
| No                                                                         | 238 (79.1) | 63 (20.9) |              |
| <b>Uses screen-based media device in bedroom</b>                           |            |           |              |
| Yes                                                                        | 156 (77.2) | 46 (22.8) | 0.746        |
| No                                                                         | 138(75.8)  | 44 (24.2) |              |
| <b>Number of types of devices owned by the respondent</b>                  |            |           |              |
| Less than three types                                                      | 25 (86.2)  | 4 (13.8)  | 0.210        |
| Three or more types                                                        | 269 (75.8) | 86 (24.2) |              |

173

174 This study found that there was no association of personal media ownership and electronic  
 175 media device in bedroom with night time screen-based media use.

176 The results of logistic regression analyses are shown in Table 5. Female participants were  
 177 less likely to have more than or equal to 5 hours screen time (AOR (Adjusted Odds Ratio)  
 178 0.356, 95% CI (1.200-0.635)) than male participants. Participant who do not view screen-  
 179 based media devices while having meal was less likely to have screen time of more than or  
 180 equal to 5 hours (AOR 0.474, 95% CI (0.277 - 0.812)) then those who don't. Likewise,  
 181 participants not having home rules limiting screen time were more likely to have screen time

182 of more than or equal to 5 hours (AOR 1.788, 95% CI (1.013-3.155)) than those who have  
 183 rules.

184

185 **Table 5: Logistic regression for factors of screen use for more than recommended hours ( $\geq 5$  hours)**

| <b>Characteristics</b>                                                | <b>Unadjusted OR (95% CI)</b> | <b>Adjusted OR (95% CI)</b> |
|-----------------------------------------------------------------------|-------------------------------|-----------------------------|
| <b>Age in years</b>                                                   |                               |                             |
| < 20                                                                  | 1                             | 1                           |
| 20 and above                                                          | 1.137 (0.577-2.244)           | 1.175 (0.578-2.389)         |
| <b>Sex</b>                                                            |                               |                             |
| Male                                                                  | 1                             | 1                           |
| Female                                                                | 0.323 (0.187-0.558)           | 0.356 (0.200-0.635)         |
| <b>Owns personal device</b>                                           |                               |                             |
| Yes                                                                   | 1                             | 1                           |
| No                                                                    | 0.743 (0.424 – 1.303)         | 0.687 (0.373 – 1.267)       |
| <b>Has internet access</b>                                            |                               |                             |
| Yes                                                                   | 1                             | 1                           |
| No                                                                    | 1.932 (0.727-5.136)           | 1.363 (0.462 – 4.016)       |
| <b>Availability of TV channels</b>                                    |                               |                             |
| Yes                                                                   | 1                             | 1                           |
| No                                                                    | 1.800 (0.876-3.700)           | 1.203 (0.548-2.639)         |
| <b>Use of screen-based media device during major meal time</b>        |                               |                             |
| Yes                                                                   | 1                             | 1                           |
| No                                                                    | 0.542 (0.325-0.903)           | 0.474 (0.277 - 0.812)       |
| <b>Presence of rule at home about using screen-based media device</b> |                               |                             |
| Yes                                                                   | 1                             | 1                           |
| No                                                                    | 1.821 (1.065-3.115)           | 1.788 (1.013-3.155)         |

**Uses screen-based media device in bedroom**

|     |                     |   |                       |
|-----|---------------------|---|-----------------------|
| Yes |                     | 1 | 1                     |
| No  | 0.925 (0.577-1.483) |   | 1.015 (0.611 – 1.686) |

**Number of types of devices owned by the respondent**

|                       |                     |   |                      |
|-----------------------|---------------------|---|----------------------|
| Less than three types |                     | 1 | 1                    |
| Three or more types   | 0.748 (0.318-1.761) |   | 6.202 (2.267-16.964) |

186

187 Regression analysis presented in Table 6 showed that participants who use screen-based  
 188 media devices for  $\geq 5$  hours a day were more likely to get inadequate sleep (AOR 3.898, 95%  
 189 CI (2.325-6.534)) than those who use screen-based media for less than 5 hours a day.  
 190 Likewise, participants who view screen-based media device before sleeping were more likely  
 191 to get inadequate sleep (AOR 3.668, 95% CI (1.784-7.539)) than those who do not view  
 192 screen-based media device before sleep.

193 **Table 6: Logistic regression for factors of inadequate sleep (<7 hours)**

| Characteristics                              | Unadjusted OR (95% CI) | Adjusted OR (95% CI) |
|----------------------------------------------|------------------------|----------------------|
| <b>Duration of use of screen-based media</b> |                        |                      |
| $\geq 5$ hours                               | 3.847 (2.313 – 6.398)  | 3.898 (2.325-6.534)  |
| < 5 hours                                    | 1                      | 1                    |
| <b>Night time screen-based media use</b>     |                        |                      |
| Yes                                          | 3.567 (1.776-7.205)    | 3.668 (1.784-7.539)  |
| No                                           | 1                      | 1                    |

194

## 195 **Discussion**

196 This study was carried out to find out the screen-based media use, factors associated with it  
197 and sleep related outcomes among health undergraduate students studying in colleges of  
198 Kathmandu valley. The study has assessed the present scenario of screen-based media use  
199 among undergraduate students and their sleep outcomes.

200 This study found that undergraduate students spend an average of 7.2 hours in a day using  
201 some form of screen-based media device which is similar to findings from a study done by  
202 Kaiser Family Foundation that showed average use screen-based media device for 7.5 hours  
203 per day among young adolescents [3]. Similar study done by Yen-Sen Lee et al, found that  
204 the students spend an average of 8.3 hours in a day using screen-based devices [13]. This  
205 study showed that most of the participants are engaged in screen-based activity during  
206 evening time. A study by Angela Lynn Sargent on screen time and sleep condition among  
207 selected college students showed that 75% students reported always use of electronic media  
208 device one hour before bedtime [18]. Similarly, this study showed that 88.8% participants  
209 reported using screen-based media device before sleeping.

210 A study by Granich and Kaiser Family Foundation studied the relationship of household  
211 screen-based media and screen-based media use among adolescents. Both study have  
212 concluded that there is positive association between availability and accessibility of media  
213 devices with time spent on screen-based media use [3,4]. In contrast to this study, the current  
214 study showed no association between accessibility and availability of screen-based media  
215 device with its use. Though, significant association was seen between having home rules  
216 limiting screen-based media use and meal time viewing of screen-based media devices with  
217 screen-based media use among the study participants. The percentage of individuals with an  
218 internet connection was recorded to be 36.7% in 2021 [19]. In contrast to this, the household  
219 with internet access were measured to be 90.9% in this study. This could be due to the fact



220 that the sample was based on the urban population of Kathmandu valley. The entire  
221 participant's household owned more than three screen-based media devices of any kind and  
222 79.4% participants had their own screen-based media device, the most commonly owned  
223 device was smartphones.

224 A study by Angela Lynn Sargent on screen time and sleep condition among selected college  
225 students showed that students on average get 6.9 hours of sleep. It also showed that 65.5% of  
226 the participants reported getting recommended 7 hours or more sleep. The study found no  
227 statistically significant difference regarding screen use before bedtime and participants hours  
228 of sleep [18]. A study carried out to see the association between portable screen-based media  
229 use and sleep outcome showed that participants who had access to media device at night were  
230 more likely to have inadequate sleep quantity, OR 1.79, 95% CI 1.39-2.31 [11]. Similarly, the  
231 current study found out that the participants got an average of 6.72 hours of sleep and also  
232 found that only 45.3% participants got recommended hours of sleep. Similar to the previous  
233 study, significant association was found between night time screen-based media use and  
234 participants sleep. A study by Nowell SB et al studied the relationship between social media  
235 use and sleep quality of undergraduate nursing students showed that sleep duration among  
236 students ranges from 4 to 10 hours, the study also showed that electronic media use correlates  
237 with poor sleep quality [20]. This study shows that the sleep duration of participants ranges  
238 from 2 to 11 hours.

239 The data presented in the study were self-reported and partly depend on the participant recall  
240 ability thus they may subject to recall bias. This study is limited to factors affecting screen-  
241 based media use among undergraduates, sleep outcomes and it does not address any health  
242 effects due to sleep inadequacy. There are many physical, psychological, behavioural and  
243 emotional aspects of screen time as well but the variables that were studied in this study were  
244 focused only on sleep related outcomes. Also, there are many other factors affecting sleep

245 outcomes of an individual beside screen-based media use but only screen-based media was  
246 studied as a factor affecting sleep.

## 247 **Conclusion**

248 This study showed that the participants on average use screen-based media devices for 7.2  
249 hours per day and only 45.3 % participants got recommended hours of sleep (7 or more  
250 hours). Around 9.4% of the participants had long sleep onset latency (more than 45 minutes).  
251 Participants who use screen-based media devices during night time before sleep were more  
252 likely to get insufficient sleep (AOR 3.668, 95% CI (1.784-7.539)).

253 Significant association was found between screen-based media use and variables such as sex  
254 of participant, use of screen-based media device during major meal time and home rules  
255 limiting screen-based media. Significant association was found between sleep adequacy with  
256 screen-based media use and night time screen-based media use. Thus, this research suggests  
257 the need to limit the use of screen-based media devices to promote quality of sleep. Overuse  
258 of screen-based media stands as an alarming problem among undergraduates and this can  
259 have direct influence on their physical and mental health. Limiting the use of screen-based  
260 media devices through the promotion of home-specific rules about screen-based media use  
261 especially about the use at night time before sleep can help undergraduate students get the  
262 recommended amount of sleep.

## 263 **Acknowledgement**

264 We would like to thank all respondents for their participation and academics of Institute of  
265 medicine for their academic guidance and support for this study.

## 266 **Conflict of interest**

267 None declared.

## 268 **Author's contribution**

269 Conceptualization: KM,

270 Data curation: KM, KK

271 Formal analysis: KM,

272 Investigation: KM,

273 Methodology: KM, RP,

274 Project administration: KM,

275 Resources: KM,

276 Supervision: RP,

277 Validation: RP, KK,

278 Writing – original draft: KM,

279 Writing – reviewing & editing: KK, KM, RP

## 280 **References**

281 1. Green A, Cohen-Zion M, Dagan Y. Evening light exposure to computer screens

282 disrupts human sleep, biological rhythms and attention abilities. *Chronobiol Int.* 2017;

283 DOI: [10.1080/07420528.2017.1324878](https://doi.org/10.1080/07420528.2017.1324878)

284 2. 2015-Pearson-Student-Mobile-Device-Survey-College.pdf

285 <https://www.pearson.com/content/dam/one-dot-com/one-dot-com/ped-blogs/wp->

286 [content/pdfs/2015-Pearson-Student-Mobile-Device-Survey-College.pdf](https://www.pearson.com/content/dam/one-dot-com/one-dot-com/ped-blogs/wp-content/pdfs/2015-Pearson-Student-Mobile-Device-Survey-College.pdf)

- 287 3. Generation M2, Media in the lives of 8 to 18 years old, A Kaiser family foundation  
288 study, January 2010. [Generation M2: Media in the Lives of 8- to 18-Year-Olds -](#)  
289 [Report \(kff.org\)](#)
- 290 4. Granich J, Rosenberg M, Knuiman MW, Timperio A. Individual, social, and physical  
291 environment factors associated with electronic media use among children: sedentary  
292 behavior at home. J Phys Act Health. 2011 Jul;8(5):613–25,  
293 DOI: [10.1123/jpah.8.5.613](https://doi.org/10.1123/jpah.8.5.613)
- 294 5. Like, Totally Wired. [https://www.mediapost.com/publications/article/117012/like-](https://www.mediapost.com/publications/article/117012/like-totally-wired.html)  
295 [totally-wired.html](https://www.mediapost.com/publications/article/117012/like-totally-wired.html)
- 296 6. Mireku MO, Barker MM, Mutz J, Dumontheil I, Thomas MSC, Rössli M, et al.  
297 Night-time screen-based media device use and adolescents' sleep and health-related  
298 quality of life. Environ Int. 2019;124:66–78. DOI: [10.1016/j.envint.2018.11.069](https://doi.org/10.1016/j.envint.2018.11.069)
- 299 7. Writers S. Expert Sleep Advice for College Students & Teens.  
300 [https://www.affordablecollegesonline.org/college-resource-center/guide-to-sleeping-](https://www.affordablecollegesonline.org/college-resource-center/guide-to-sleeping-for-college-students-and-teens/)  
301 [for-college-students-and-teens/](https://www.affordablecollegesonline.org/college-resource-center/guide-to-sleeping-for-college-students-and-teens/)
- 302 8. Factors that Interfere with Healthy Sleep - ResMed India.  
303 <https://www.resmed.co.in/healthy-sleep/factors-that-interfere>
- 304 9. Hysing M, Pallesen S, Stormark KM, Jakobsen R, Lundervold AJ, Sivertsen B. Sleep  
305 and use of electronic devices in adolescence: results from a large population-based  
306 study. BMJ Open. 2015 Feb 2;5(1):e006748. DOI: [10.1136/bmjopen-2014-006748](https://doi.org/10.1136/bmjopen-2014-006748)
- 307 10. Arora T, Broglia E, Thomas GN, Taheri S. Associations between specific  
308 technologies and adolescent sleep quantity, sleep quality, and parasomnias. Sleep  
309 Med. 2013 Jan 1;15. DOI: [10.1016/j.sleep.2013.08.799](https://doi.org/10.1016/j.sleep.2013.08.799)
- 310 11. Carter B, Rees P, Hale L, Bhattacharjee D, Paradkar MS. Association Between  
311 Portable Screen-Based Media Device Access or Use and Sleep Outcomes: A

- 312 Systematic Review and Meta-analysis. JAMA Pediatr. 2016 01;170(12):1202–8.  
313 DOI: [10.1001/jamapediatrics.2016.2341](https://doi.org/10.1001/jamapediatrics.2016.2341)
- 314 12. Woods HC, Scott H. Social media use in adolescence is associated with poor sleep  
315 quality, anxiety, depression and low self-esteem.  
316 DOI: [10.1016/j.adolescence.2016.05.008](https://doi.org/10.1016/j.adolescence.2016.05.008)
- 317 13. Lee Y-S, Low B-S. Sleep pattern among electronic device users and its relationship  
318 with users' practice in Malaysia university community. Sleep Biol Rhythms. 2016 Jul  
319 1;14(3):271–7. DOI: [10.1007/s41105-016-0052-z](https://doi.org/10.1007/s41105-016-0052-z)
- 320 14. Suganuma N et.al Using electronic media before sleep can curtail sleep time and  
321 result in self-perceived insufficient sleep. DOI:[10.1111/j.1479-8425.2007.00276.x](https://doi.org/10.1111/j.1479-8425.2007.00276.x)
- 322 15. Cain N, Gradisar M. Electronic media use and sleep in school-aged children and  
323 adolescents: A review. Sleep Med. 2010 Sep;11(8):735–42.  
324 DOI: [10.1016/j.sleep.2010.02.006](https://doi.org/10.1016/j.sleep.2010.02.006)
- 325 16. Hale L, Kirschen GW, LeBourgeois MK, Gradisar M, Garrison MM, Montgomery-  
326 Downs H, et al. Youth Screen-based media Habits and Sleep: Sleep-Friendly Screen  
327 Behavior Recommendations for Clinicians, Educators, and Parents. Child Adolesc  
328 Psychiatr Clin N Am. 2018;27(2):229–45. DOI: [10.1016/j.chc.2017.11.014](https://doi.org/10.1016/j.chc.2017.11.014)
- 329 17. Asaoka S, Kamada Y et.al. Exploring the Daily Activities Associated with Delayed  
330 Bedtime of Japanese University Students.  
331 [https://www.jstage.jst.go.jp/article/tjem/221/3/221\\_3\\_245/\\_pdf](https://www.jstage.jst.go.jp/article/tjem/221/3/221_3_245/_pdf)
- 332 18. Sargent Angela Lynn. Screen Time and Sleep Condition among Selected College  
333 Students.  
334 <https://cornerstone.lib.mnsu.edu/cgi/viewcontent.cgi?article=1679&context=etds>
- 335 19. Digital in Nepal: All the Statistics You Need in 2021. DataReportal – Global Digital  
336 Insights. <https://datareportal.com/reports/digital-2021-nepal>

- 337        20. Nowell SB, Thompson K. Relationship between Social Media Use and Sleep Quality  
338            of Undergraduate Nursing Students at a Southeastern University.

## 339 **Supporting information**

340 **S1 Dataset. Study dataset and data labels**

341 **S2 Appendix. Study questionnaire**

342 **S3 Appendix. Results of regression analysis**

343 **S4 File. Institutional Review Committee approval letter**
